# Supplementary material
Source: Springer Nature journal article supplement (https://www.springermedizin.de/resource/supplementary/12931_2013_1425_MOESM5_ESM.pdf/9425968)

**A**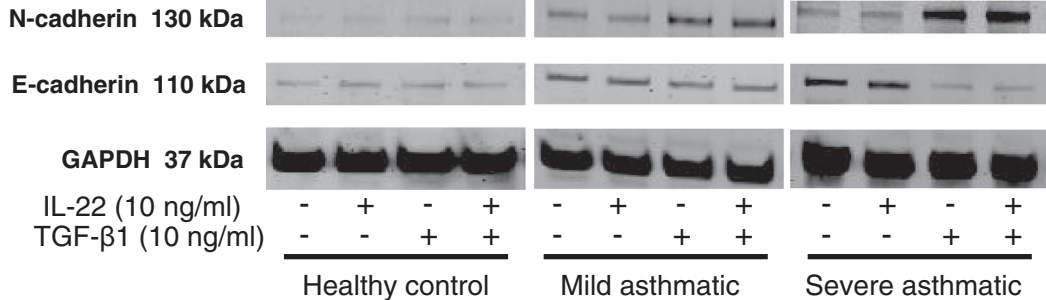**B**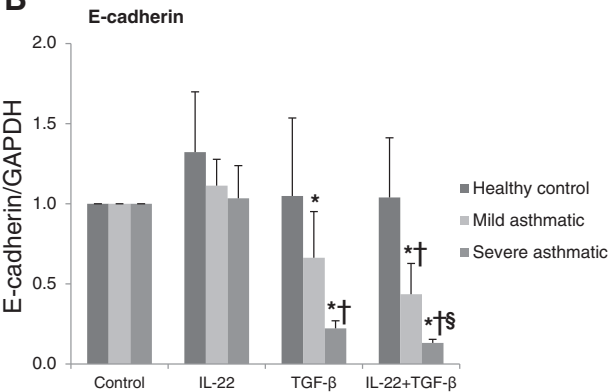**C**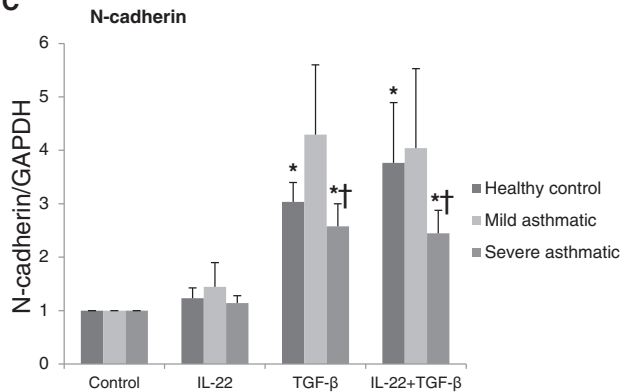

Supplement: MOESM5 [file 9425968]
